# Supplementary material
Source: publisher site journal article supplement (https://www.spandidos-publications.com/8412/downloadSupplementary)
Supplement: Supplementary file [file downloadSupplementary]

Table SI. Patient demographics.

| A, Demographics of the studies included in the present systematic review |                                |                       |              |           |                                                                               |                                                                                                   |                                                                                                                             |                                |                      |
|--------------------------------------------------------------------------|--------------------------------|-----------------------|--------------|-----------|-------------------------------------------------------------------------------|---------------------------------------------------------------------------------------------------|-----------------------------------------------------------------------------------------------------------------------------|--------------------------------|----------------------|
| First author, year of publication                                        | Included patients <sup>a</sup> | Total no. of patients | Age, years   | Sex (F/M) | Presenting symptoms                                                           | Primary cancer/histology                                                                          | Lesion location                                                                                                             | Lesion size                    | (Refs.) <sup>b</sup> |
| Andreev, 2020                                                            | 1                              | 1                     | 55           | n/a       | 1 Acute right-sided ptosis, visual impairment, amnesia, euphoric mood, ataxia | Breast                                                                                            | Endo-supra-retrosellar                                                                                                      | n/a                            | (7)                  |
| Ansari, 2020                                                             | 17                             | 117                   | n/a          | n/a       | n/a                                                                           | n/a                                                                                               | n/a                                                                                                                         | n/a                            | (8)                  |
| Barkhoudarian, 2017                                                      | 11                             | 11                    | 60.5 (45-75) | 6/5       | (7/11) hemiparesis<br>(3/11) asymptomatic<br>(1/11) generalized seizure       | (3/11) lung carcinoma<br>(4/11) Melanoma<br>(2/11) Bladder<br>(1/11) Breast<br>(1/11) Ovarian     | Deep medial cortical tumours<br><br>(4/11) medial frontal<br>(2/11) precuneus<br>(4/11) paracentral lobule<br>(1/11) cuneus | 5.5 cm <sup>3</sup> (0.4-16.4) | (9)                  |
| Bettag, 2022                                                             | 26                             | 26                    | n/a          | 10/16     | n/a                                                                           | 9/26 NSCLC<br>3/26 SCLC<br>3/26 GIT<br>2/26 Breast<br>7/26 Melanoma<br>1/26 Renal<br>1/26 Unknown | 16/26 Supratentorial<br>10/26 infratentorial                                                                                | Max diameter: 33.42±15.32 mm   | (10)                 |

|                  |    |    |              |     |                                                                                                                   |                                                  |                                                     |                                                      |      |
|------------------|----|----|--------------|-----|-------------------------------------------------------------------------------------------------------------------|--------------------------------------------------|-----------------------------------------------------|------------------------------------------------------|------|
| Cathel, 2019     | 1  | 1  | 65           | 0/1 | 1 right-sided headache and complete ophthalmoplegia of the right eye                                              | Hepatocellular carcinoma                         | Clivus with invasion into the right cavernous sinus | n/a                                                  | (11) |
| Ceylan, 2009     | 1  | 13 | 53           | 1/0 | n/a                                                                                                               | n/a                                              | Midline skull base                                  | n/a                                                  | (12) |
| Choo, 2018       | 2  | 20 | 47.5 (45-50) | 2/0 | n/a                                                                                                               | n/a                                              | 1 Temporal<br>1 Cerebellum                          | 1/2 0.74 cm <sup>3</sup><br>1/2 6.94 cm <sup>3</sup> | (13) |
| Gazzeri, 2014    | 4  | 97 | n/a          | n/a | n/a                                                                                                               | n/a                                              | n/a                                                 | n/a                                                  | (14) |
| Hanada, 2010     | 2  | 2  | 53 (37-69)   | 0/2 | 1 gait disturbance, dementia, and urinary incontinence<br><br>1 vomiting, headache, and consciousness disturbance | 1 SCLC<br><br>1 Thyroid                          | (2/2) Pineal region                                 | 23 mm<br>28 mm                                       | (15) |
| Hong, 2016       | 2  | 20 | 56 (37-75)   | 1/1 | Ataxia                                                                                                            | 1 Lung<br>1 Breast                               | (2/2) Rt Cerebellum                                 | n/a                                                  | (16) |
| Hu, 2020         | 1  | 1  | 55           | 1/0 | 1 fatigue, dizziness, unsteady balance, bilateral temporal headaches, memory loss and mild mood alterations       | Lung Large cell neuroendocrine carcinoma (LCNEC) | Sellar and Suprasellar                              | 10 mm                                                | (17) |
| Iacoangeli, 2012 | 1  | 2  | 61           | 1/0 | unsteady gait, headache, nausea                                                                                   | GIT                                              | choroid plexus lateral ventricle                    | n/a                                                  | (18) |
| Jeon, 2018       | 1  | 9  | 54           | 0/1 | n/a                                                                                                               | Renal cell carcinoma                             | Middle cranial fossa                                | n/a                                                  | (19) |
| Jiminez, 2017    | 2  | 13 | n/a          | 2/0 | n/a                                                                                                               | 2/2 Breast                                       | n/a                                                 | n/a                                                  | (20) |
| Kassam, 2009     | 12 | 21 | 63 (44-      | 5/7 | n/a                                                                                                               | (6/12) NSCLC                                     | (6/12) cerebellum                                   | 37.8 mm                                              | (21) |

|                |    |    |                  |     |                                                                     |                                                                                     |                                                                                                                                    |             |      |
|----------------|----|----|------------------|-----|---------------------------------------------------------------------|-------------------------------------------------------------------------------------|------------------------------------------------------------------------------------------------------------------------------------|-------------|------|
|                |    |    | 79)              |     |                                                                     | (3/12) Breast<br>(1/12) Oesophagus<br>(1/12) Renal<br>(1/12) vaginal adenocarcinoma | (1/12) temporal<br>(2/12) parietooccipital<br>(1/12) frontoparietal<br>(1/12) frontal operculum,<br>perisylvian<br>(1/12) parietal |             |      |
| Kruljac, 2010  | 1  | 1  | 70               | 0/1 | 1 Diplopia, syncope, headache,<br>general malaise, loss of appetite | Laryngeal Squamous Cell Carcinoma                                                   | Sellar and Suprasellar                                                                                                             | 35x25x25 mm | (22) |
| Kutlay, 2016   | 2  | 13 | 47 (44-<br>50)   | 0/2 | Headache                                                            | n/a                                                                                 | 1 Rt Frontal<br>1 Rt Parietal                                                                                                      | 2/2 41 mm   | (23) |
| Kutlay, 2021   | 7  | 18 | 57.14<br>(37-75) | 3/4 | n/a                                                                 | 4 Lung Adenocarcinoma<br>2 SCLC<br>1 Breast                                         | 1 L temporo-parietal<br>1 L frontal<br>1 R parietal<br>1 R caudate nucleus<br>1 R atrium<br>1 L temporal<br>1 L occipital          | n/a         | (24) |
| Kutlay, 2021   | 7  | 20 | 59.86<br>(37-75) | 3/4 | n/a                                                                 | 5 Lung<br>2 Breast                                                                  | 1 R caudate nucleus<br>1 R atrium<br>2 L atrium<br>2 L temporal horn<br>2 L occipital horn                                         | n/a         | (25) |
| Ma, 2018       | 11 | 45 | n/a              | n/a | n/a                                                                 | n/a                                                                                 | 11/11 Temporal lobe                                                                                                                | n/a         | (26) |
| Maeshima, 2022 | 1  | 1  | 76               | 0/1 | 1 Aphasia, Hemiplegia                                               | Small cell carcinoma of the urinary                                                 | Lt Basal ganglia                                                                                                                   | n/a         | (27) |

|                  |    |    |              |       |                                                                    |                                                                            |                                                                                         |                             |      |
|------------------|----|----|--------------|-------|--------------------------------------------------------------------|----------------------------------------------------------------------------|-----------------------------------------------------------------------------------------|-----------------------------|------|
|                  |    |    |              |       |                                                                    | bladder                                                                    |                                                                                         |                             |      |
| McLaughlin, 2012 | 2  | 31 | 54.5 (41-68) | 1/1   | n/a                                                                | 1 Melanoma<br>1 GIT                                                        | n/a                                                                                     | n/a                         | (28) |
| Mitsumasa, 2020  | 1  | 1  | 42           | 1/0   | 1 Diplopia, headache, nausea, disorientation, urinary incontinence | Lung sarcomatoid carcinoma                                                 | Pineal gland                                                                            | 1.9x1.5x1.9 cm              | (29) |
| Nemoto, 2013     | 1  | 1  | 63           | 1/0   | 1 Gait disturbance, dementia, urinary incontinence                 | Lung Adenocarcinoma                                                        | Pineal                                                                                  | 25 mm                       | (30) |
| Newman, 2019     | 2  | 16 | 64.5 (63-66) | 0 / 2 | n/a                                                                | 1/2 NSCLC<br>1/2 Esophageal Adenocarcinoma                                 | 1/2 Parietal<br>1/2 Basal Ganglia                                                       | n/a                         | (31) |
| Plaha, 2014      | 12 | 48 | n/a          | n/a   | n/a                                                                | (10/12) adenocarcinoma (breast, lung, gastrointestinal)<br>(2/12) Melanoma | n/a                                                                                     | n/a                         | (32) |
| Serra, 2020      | 1  | 92 | n/a          | n/a   | n/a                                                                | n/a                                                                        | Thalamic                                                                                | n/a                         | (33) |
| Shirane, 2001    | 2  | 14 | 65 (60-70)   | 1/1   | 1 difficulty walking and headaches                                 | 1 Lung                                                                     | 1 left posterior fossa<br>1 Anterosuperior Cerebellum                                   | (1/2) 2.5x2 cm<br>(1/2) n/a | (34) |
| Souweidane, 2000 | 1  | 12 | 56           | n/a   | n/a                                                                | 1 Melanoma                                                                 | n/a                                                                                     | 30 mm                       | (35) |
| Stamates, 2018   | 1  | 1  | 60           | 1/0   | 1 Headache, Rt Cheek Pain and Numbness                             | Endometrial carcinoma                                                      | Infratemporal fossa, Middle fossa, Cavernous sinus, Trigeminal nerve, and Nasal sinuses | n/a                         | (36) |
| Villanueva, 2015 | 2  | 4  | 52 (39-      | 2/0   | 1 scintillating scotoma in RT                                      | 1 Melanoma                                                                 | 1 Lt Medial Occipital                                                                   | n/a                         | (37) |

|                |    |    |              |     |                                                                                                                                       |                                                                                                                                             |                                                                                                                                                                                         |                |      |
|----------------|----|----|--------------|-----|---------------------------------------------------------------------------------------------------------------------------------------|---------------------------------------------------------------------------------------------------------------------------------------------|-----------------------------------------------------------------------------------------------------------------------------------------------------------------------------------------|----------------|------|
|                |    |    | 65)          |     | visual field<br>1 incidental PET finding                                                                                              | 1 Breast                                                                                                                                    | Lobe<br>1 Lt Intraventricular<br>extending into posterior<br>medial temporal lobe                                                                                                       |                |      |
| Zacharia, 2015 | 12 | 12 | 64.3 (49-80) | 8/4 | (6/12) visual loss<br>(5/12) Headache/neck pain<br>(3/12) cranial nerve palsy<br>(1/12) nausea and dizziness<br>(1/12) endocrinopathy | (4/12) Breast<br>(3/12) lung adenocarcinoma<br>(2/12) Thyroid<br>(1/12) bladder adenocarcinoma<br>(1/12) Renal<br>(1/12) prostate carcinoma | (3/12) sellar/suprasellar<br>(3/12) clivus<br>(2/12) sphenoid/ethmoid<br>sinuses<br>(1/12) suprasellar<br>(1/12) cavernous sinus<br>(1/12) craniovertebral<br>junction<br>(1/12) sellar | n/a            | (38) |
| Zagzoog, 2017  | 1  | 1  | 43           | 1/0 | 1 horizontal diplopia with right<br>lateral gaze, complete right<br>sixth nerve palsy                                                 | Lt Scapular myxoid liposarcoma                                                                                                              | Sellar and parasellar                                                                                                                                                                   | 3.9x2.8x3.7 cm | (39) |
| Zhang, 2018    | 1  | 1  | 54           | 0/1 | asthenia, ptosis, diplopia                                                                                                            | Renal cell carcinoma                                                                                                                        | clivus                                                                                                                                                                                  | n/a            | (40) |

B, Summary of the data in the included studies

|  | Included patients <sup>a</sup> | Total no. of patients  | Age, years                | Sex (F/M)        | Presenting symptoms                            | Primary cancer/histology               | Lesion location                                             | Lesion size      |  |
|--|--------------------------------|------------------------|---------------------------|------------------|------------------------------------------------|----------------------------------------|-------------------------------------------------------------|------------------|--|
|  | Total: 150<br>Average: 4.41    | Total: 686<br>Average: | Average: 57.46<br>(37-80) | 51/54<br>Female: | Reported (18/34)<br>Presenting symptoms varied | Reported 27/34<br>42/113 (37.17%) Lung | <b>Reported (29/34)</b><br><b>Supratentorial - (93/115)</b> | Reported (13/34) |  |

|                                                                                                                                                             |                                                                                                                                                                         |  |                                                     |  |                                                                                                                                                                                                                                                                                                                                                                                                                                                                                                                                                                                                                                                                                                                                                                                                                                                                                                                       |                                                                                                                                                                                                                                                                                                                                                                                                                                                                                                                                                                                |                                                                                            |  |
|-------------------------------------------------------------------------------------------------------------------------------------------------------------|-------------------------------------------------------------------------------------------------------------------------------------------------------------------------|--|-----------------------------------------------------|--|-----------------------------------------------------------------------------------------------------------------------------------------------------------------------------------------------------------------------------------------------------------------------------------------------------------------------------------------------------------------------------------------------------------------------------------------------------------------------------------------------------------------------------------------------------------------------------------------------------------------------------------------------------------------------------------------------------------------------------------------------------------------------------------------------------------------------------------------------------------------------------------------------------------------------|--------------------------------------------------------------------------------------------------------------------------------------------------------------------------------------------------------------------------------------------------------------------------------------------------------------------------------------------------------------------------------------------------------------------------------------------------------------------------------------------------------------------------------------------------------------------------------|--------------------------------------------------------------------------------------------|--|
| <p>(1-26)</p> <p>15 of the included papers only had 1 patient who has undergone neuroendoscopy for the biopsy or resection of a metastatic brain tumour</p> | <p>20.17 (1-17)</p> <p>150/686 (21.87%) of patients in the included studies have undergone neuro-endoscopy for the biopsy or resection of a metastatic brain tumour</p> |  | <p>51/105 (48.57%)</p> <p>Male: 54/105 (51.43%)</p> |  | <ul style="list-style-type: none"> <li>- 26/113 (23.01%) NSCLC</li> <li>- 6/113 (5.31%) SCLC</li> <li>- 10/113 (8.75%) Unclassified</li> </ul> <p>18/113 (15.93%) Breast</p> <p>16/113 (14.16%) Melanoma</p> <p>10/113 (8.75%) Unclassified Adenocarcinoma (Breast, Lung, GIT)</p> <p><b>OTHER 27/113 (23.89) (ALL BELOW THIS LINE)</b></p> <p>5/113 (4.42%) Renal</p> <ul style="list-style-type: none"> <li>- 3/113 (2.65%) Unclassified</li> <li>- 2/113 (1.77%) RCC</li> </ul> <p>5/113 (4.42%) GIT</p> <p>4/113 (3.54%) Bladder</p> <ul style="list-style-type: none"> <li>- 2/113 (1.77%) Unclassified</li> <li>- 1/113 (0.88%) Small Cell</li> <li>- 1/113 (0.88%) Adenocarcinoma</li> </ul> <p>3/113 (2.65%) Thyroid</p> <p>2/113 (1.77%) Oesophagus</p> <ul style="list-style-type: none"> <li>- 1/113 (0.88%) Adenocarcinoma</li> <li>- 1/113 (0.88%) Unclassified</li> </ul> <p>1/113 (0.88%) Prostate</p> | <p><b>Ventricular (10/115)</b></p> <p>1 R atrium (lat ventricular)</p> <p>1 R atrium (lat ventricular)</p> <p>2 L atrium (lat ventricular)</p> <p>2 L temporal horn (lat ventricular)</p> <p>2 L occipital horn (lat ventricular)</p> <p>1 Lt Intraventricular extending into posterior medial temporal lobe</p> <p>1 choroid plexus lateral ventricle</p> <p><b>Cortical (38/115)</b></p> <p>(1/12) temporal</p> <p>(2/12) parietooccipital</p> <p>(1/12) frontoparietal</p> <p>(1/12) frontal operculum, perisylvian</p> <p>(1/12) parietal</p> <p>(4/11) medial frontal</p> | <p>Max dimension (8/13) - Range: 10-41mm</p> <p>Dimensions (4/13)</p> <p>Volume (1/13)</p> |  |
|-------------------------------------------------------------------------------------------------------------------------------------------------------------|-------------------------------------------------------------------------------------------------------------------------------------------------------------------------|--|-----------------------------------------------------|--|-----------------------------------------------------------------------------------------------------------------------------------------------------------------------------------------------------------------------------------------------------------------------------------------------------------------------------------------------------------------------------------------------------------------------------------------------------------------------------------------------------------------------------------------------------------------------------------------------------------------------------------------------------------------------------------------------------------------------------------------------------------------------------------------------------------------------------------------------------------------------------------------------------------------------|--------------------------------------------------------------------------------------------------------------------------------------------------------------------------------------------------------------------------------------------------------------------------------------------------------------------------------------------------------------------------------------------------------------------------------------------------------------------------------------------------------------------------------------------------------------------------------|--------------------------------------------------------------------------------------------|--|

|  |  |  |  |  |                                                                                                                                                                                                                                                                          |                                                                                                                                                                                                                                                                                                                                                                                                                                                                                                                                        |  |  |
|--|--|--|--|--|--------------------------------------------------------------------------------------------------------------------------------------------------------------------------------------------------------------------------------------------------------------------------|----------------------------------------------------------------------------------------------------------------------------------------------------------------------------------------------------------------------------------------------------------------------------------------------------------------------------------------------------------------------------------------------------------------------------------------------------------------------------------------------------------------------------------------|--|--|
|  |  |  |  |  | <p>1/113 (0.88%) Vaginal Adenocarcinoma</p> <p>1/113 (0.88%) Ovarian</p> <p>1/113 (0.88%) Endometrial</p> <p>1/113 (0.88%) Laryngeal SCC</p> <p>1/113 (0.88%) Scapular Myxoid Liposarcoma</p> <p>1/113 (0.88%) Hepatocellular Carcinoma</p> <p>1/113 (0.88%) Unknown</p> | <p>(2/11) precuneus</p> <p>(4/11) paracentral lobule</p> <p>(1/11) cuneus</p> <p>1 L temporo-parietal</p> <p>1 L frontal</p> <p>1 R parietal</p> <p>1 L temporal</p> <p>1 L occipital</p> <p>1 Rt Frontal</p> <p>1 Rt Parietal</p> <p>1 Temporal</p> <p>1 Lt Medial Occipital Lobe</p> <p>1/2 Parietal</p> <p>11/11 Temporal lobe</p> <p><b>Subcortical (9/115)</b></p> <p>1 R caudate nucleus</p> <p>1 R caudate nucleus</p> <p>2 Pineal Region</p> <p>1 Lt Basal Ganglia</p> <p>1 Pineal</p> <p>1 Pineal Gland</p> <p>1 Thalamic</p> |  |  |
|--|--|--|--|--|--------------------------------------------------------------------------------------------------------------------------------------------------------------------------------------------------------------------------------------------------------------------------|----------------------------------------------------------------------------------------------------------------------------------------------------------------------------------------------------------------------------------------------------------------------------------------------------------------------------------------------------------------------------------------------------------------------------------------------------------------------------------------------------------------------------------------|--|--|

|  |  |  |  |  |  |                                                                                                                                                                                                                                                                                                                                                                                                                                                                                                                                                                                          |  |  |
|--|--|--|--|--|--|------------------------------------------------------------------------------------------------------------------------------------------------------------------------------------------------------------------------------------------------------------------------------------------------------------------------------------------------------------------------------------------------------------------------------------------------------------------------------------------------------------------------------------------------------------------------------------------|--|--|
|  |  |  |  |  |  | <p>1/2 Basal Ganglia</p> <p><b>Sinuses (4/115)</b></p> <p>(1/12) intraorbital extension /infratemporal fossa /ethmoid and sphenoid sinuses</p> <p>(1/12) ethmoid and sphenoid sinus/lamina papyracea/intracranial</p> <p>(1/12) cavernous sinus</p> <p>1 Infratemporal fossa, Middle fossa, Cavernous sinus, Trigeminal nerve, and Nasal sinuses</p> <p><b>Sellar (14/115)</b></p> <p>(1/12) suprasellar</p> <p>(1/12) sellar)</p> <p>(3/12) sellar/suprasellar</p> <p>(3/12) clivus)</p> <p>1 Sellar and Suprasellar</p> <p>1 Sellar and Parasellar</p> <p>1 Sellar and Suprasellar</p> |  |  |
|--|--|--|--|--|--|------------------------------------------------------------------------------------------------------------------------------------------------------------------------------------------------------------------------------------------------------------------------------------------------------------------------------------------------------------------------------------------------------------------------------------------------------------------------------------------------------------------------------------------------------------------------------------------|--|--|

|  |  |  |  |  |  |                                                                                                                                                                                                                                                                                                                                                                                                                                                                                                                     |  |  |
|--|--|--|--|--|--|---------------------------------------------------------------------------------------------------------------------------------------------------------------------------------------------------------------------------------------------------------------------------------------------------------------------------------------------------------------------------------------------------------------------------------------------------------------------------------------------------------------------|--|--|
|  |  |  |  |  |  | <p>1 Endo-supra-retrosellar<br/> 1 Clivus with invasion into the right cavernous sinus<br/> 1 clivus</p> <p><b>Other (18/115)</b><br/> 1 Middle Cranial Fossa<br/> 16/26 Supratentorial<br/> 1 Midline Skull Base</p> <p><b>Infratentorial (22/115)</b></p> <p><b>Cerebellum (10/115)</b><br/> 1 Anterosuperior Cerebellum<br/> (6/12) cerebellum<br/> 2 Rt Cerebellum<br/> 1 Cerebellum</p> <p><b>Other (12/115)</b><br/> 1 left posterior fossa<br/> (1/12) craniocervical junction<br/> 10/26 infratentorial</p> |  |  |
|--|--|--|--|--|--|---------------------------------------------------------------------------------------------------------------------------------------------------------------------------------------------------------------------------------------------------------------------------------------------------------------------------------------------------------------------------------------------------------------------------------------------------------------------------------------------------------------------|--|--|

<sup>a</sup>Included patients refers to those patients who have undergone neuroendoscopy for the biopsy or resection of a metastatic brain tumour, and are therefore included in the analysis. The total no. of patients refers to the total number of patients included in the study regardless of the diagnosis or procedure undergone. <sup>b</sup>Reference citations refer to the reference list in the main manuscript.

Table SII. Summary of the procedures performed in the included studies.

| A, Procedures in the included studies |                      |                                         |                              |                     |              |                       |                       |                                                          |                                                                                          |                      |
|---------------------------------------|----------------------|-----------------------------------------|------------------------------|---------------------|--------------|-----------------------|-----------------------|----------------------------------------------------------|------------------------------------------------------------------------------------------|----------------------|
| First author, year of publication     | Biopsy vs. resection | Combined with open vs. fully endoscopic | Rigid vs. flexible endoscope | Route and technique | Fluorescence | Adjuvant chemotherapy | Adjuvant radiotherapy | Preoperative assessment                                  | Post-operative assessment                                                                | (Refs.) <sup>a</sup> |
| Andreev, 2020                         | Both                 | Fully endoscopic                        | n/a                          | Extended endonasal  | n/a          | n/a                   | n/a                   | MRI                                                      | CT on 1 <sup>st</sup> postoperative day<br><br>MRI on 11 <sup>th</sup> postoperative day | (7)                  |
| Ansari, 2020                          | Both                 | Combined                                | Rigid                        | Transorbital        | Y            | n/a                   | n/a                   | MRI                                                      | MRI (immediate and 3 month)                                                              | (8)                  |
| Barkhoudarian, 2017                   | Resection            | Combined                                | n/a                          | Transcranial        | N            | n/a                   | n/a                   | MRI (with contrast enhanced)                             | MRI within 24-48 h<br><br>Neurological assessment                                        | (9)                  |
| Bettag, 2022                          | Both                 | Combined                                | n/a                          | Transcranial        | Y            | n/a                   | n/a                   | MRI (T1 weighted)                                        | n/a                                                                                      | (10)                 |
| Cathel, 2019                          | Biopsy               | Fully endoscopic                        | Rigid                        | Extended endonasal  | N            | n/a                   | n/a                   | MRI                                                      | n/a                                                                                      | (11)                 |
| Ceylan, 2009                          | Resection            | Fully endoscopic                        | n/a                          | Extended endonasal  | n/a          | n/a                   | n/a                   | MRI (1.5-T contrast-enhanced magnetic resonance imaging) | n/a                                                                                      | (12)                 |

|                  |                             |                  |       |                    |           |     |     |                             |                                                                                                                                             |      |
|------------------|-----------------------------|------------------|-------|--------------------|-----------|-----|-----|-----------------------------|---------------------------------------------------------------------------------------------------------------------------------------------|------|
| Choo, 2018       | Resection                   | Fully endoscopic | Rigid | n/a                | Y (5-ALA) | n/a | n/a | MRI (T1 and T2 Weighted)    | CT within 24 h to assess for haemorrhages<br><br>Postoperative MRI within 1 week (T1 weighted, non-contrast enhanced and contrast enhanced) | (13) |
| Gazzeri, 2014    | Resection                   | Fully endoscopic | Rigid | Transorbital       | n/a       | n/a | n/a | MRI and/or head CT          | Contrast-enhanced MRI within 48 h after surgery and 6 weeks post-operatively                                                                | (14) |
| Hanada, 2010     | Biopsy and ventri-culostomy | Fully endoscopic | n/a   | Transcranial       | n/a       | n/a | Y   | 1 CT, MRI, PET<br>1 CT, MRI | MRI                                                                                                                                         | (15) |
| Hong, 2016       | Resection                   | Fully endoscopic | Rigid | n/a                | n/a       | n/a | n/a | n/a                         | MRI within 24 h<br><br>T1-weighted and T2-weighted FLAIR images 2 or more months after surgery                                              | (16) |
| Hu, 2020         | Resection                   | Fully endoscopic | n/a   | Extended endonasal | n/a       | N   | Y   | MRI & CT                    | MRI                                                                                                                                         | (17) |
| Iacoangeli, 2012 | Resection                   | Fully endoscopic | Rigid | Transcranial       | N         | Y   | Y   | MRI                         | CT, MRI, PET, gastroscopy, colonoscopy, capsule endoscopy                                                                                   | (18) |

|               |           |                  |       |                    |                               |     |     |                                           |                                                                                                                  |      |
|---------------|-----------|------------------|-------|--------------------|-------------------------------|-----|-----|-------------------------------------------|------------------------------------------------------------------------------------------------------------------|------|
| Jeon, 2018    | Resection | Fully endoscopic | Rigid | Transorbital       | n/a                           | n/a | n/a | MRI and CT                                | MRI                                                                                                              | (19) |
| Jiminez, 2017 | Biopsy    | Combined         | Rigid | Transcranial       | n/a                           | n/a | n/a | n/a                                       | n/a                                                                                                              | (20) |
| Kassam, 2009  | Resection | Fully endoscopic | Rigid | Transcranial       | N                             | n/a | n/a | MRI (contrast enhanced), (CT in one case) | Intraoperative CT (non-cerebellar)<br><br>MRI w/w/out IV contrast<br><br>Neurological assessment                 | (21) |
| Kruljac, 2010 | Resection | Fully endoscopic | n/a   | Extended endonasal | n/a                           | N   | Y   | MRI                                       | n/a                                                                                                              | (22) |
| Kutlay, 2016  | Resection | Fully endoscopic | Rigid | Transcranial       | n/a                           | n/a | n/a | T1 Weighted MRI                           | Postoperative CT on first post-operative day<br><br>MRI with and without IV contrast within 2 days after surgery | (23) |
| Kutlay, 2021  | Resection | Fully endoscopic | Rigid | Transcranial       | Y (Fluorescein sodium guided) | n/a | n/a | KPS Score<br>MRI                          | KPS Score at discharge and 3M follow-up<br><br>MRI within 48 hours after surgery                                 | (24) |
| Kutlay, 2021  | Resection | Fully endoscopic | Rigid | Transcranial       | Y (Fluorescein sodium)        | n/a | n/a | KPS Score<br>MRI                          | KPS Score at discharge and 3M follow-up                                                                          | (25) |

|                  |                            |                  |          |              |          |     |     |                                                                                                  |                                         |      |
|------------------|----------------------------|------------------|----------|--------------|----------|-----|-----|--------------------------------------------------------------------------------------------------|-----------------------------------------|------|
|                  |                            |                  |          |              | guided)  |     |     |                                                                                                  | MRI within first 24-48 h after surgery  |      |
| Ma, 2018         | Resection                  | Fully endoscopic | Rigid    | Transcranial | Y (0/11) | N   | N   | MRI (volumetric T1-weighted, DTI, T2 weighted, fluorescence <i>in situ</i> hybridization (FLAIR) | MRI within 24-48 h                      | (26) |
| Maeshima, 2022   | Resection                  | Fully endoscopic | Flexible | Transcranial | n/a      | N   | Y   | CT & MRI (T1 and T2 Weighted, Gadolinium Enhanced)                                               |                                         | (27) |
| McLaughlin, 2012 | Resection                  | Fully endoscopic | Rigid    | Transcranial | n/a      | n/a | n/a | T1 Weighted post gadolinium MRI                                                                  | T1 Weighted post gadolinium MRI         | (28) |
| Mitsumasa, 2020  | Biopsy and ventriculostomy | Fully endoscopic | Flexible | Transcranial | n/a      | n/a | n/a | MRI (contrast)                                                                                   | n/a                                     | (29) |
| Nemoto, 2013     | Biopsy and ventriculostomy | Fully endoscopic | Flexible | Transcranial | N        | Y   | Y   | CT & MRI (T1 & T2 Weighted)                                                                      | PET CT MRI                              | (30) |
| Newman, 2019     | Resection                  | Combined         | n/a      | Transcranial | n/a      | n/a | n/a | MRI CT                                                                                           | Immediate CT<br>Delayed MRI at 3 months | (31) |

|                  |           |                  |       |                                     |                         |           |           |                                                                 |                                                                                                       |      |
|------------------|-----------|------------------|-------|-------------------------------------|-------------------------|-----------|-----------|-----------------------------------------------------------------|-------------------------------------------------------------------------------------------------------|------|
| Plaha, 2014      | Resection | Fully endoscopic | Rigid | Transcranial                        | N                       | n/a       | n/a       | MRI (T1-weighted contrast-enhanced)                             | CT, MRI, or FLAIR MRI                                                                                 | (32) |
| Serra, 2020      | Resection | Combined         | n/a   | Transcranial                        | Y (not helpful)         | n/a       | n/a       | Complete neurological examination<br><br>3-T MRI (Tractography) | Complete Neurological Examination at discharge and 3 months<br><br>3-T MRI (Tractography) at 3 months | (33) |
| Shirane, 2001    | Resection | Fully endoscopic | n/a   | Transcranial                        | n/a                     | n/a       | Y (1/2)   | MRI (Gadolinium-enhanced T1 weighted)                           | MRI (Gadolinium-enhanced T1 weighted)<br><br>CT                                                       | (34) |
| Souweidane, 2000 | Biopsy    | Fully endoscopic | Rigid | Transcranial                        | n/a                     | n/a       | n/a       | MRI with gadolinium                                             | MRI or CT within 48 hours of procedure                                                                | (35) |
| Stamates, 2018   | Resection | Combined         | n/a   | Transorbital and extended endonasal | n/a                     | Y         | Y         | MRI                                                             | MRI                                                                                                   | (36) |
| Villanueva, 2015 | Resection | Combined         | n/a   | Transcranial                        | n/a                     | Y (1/2)   | N         | MRI                                                             | MRI                                                                                                   | (37) |
| Zacharia, 2015   | Both      | Fully endoscopic | Rigid | Extended endonasal                  | Y (to detect CSF leaks) | Y (11/12) | Y (11/12) | MRI (Gadolinium enhanced)                                       | MRI (Gadolinium enhanced)                                                                             | (38) |
| Zagzoog, 2017    | Resection | Fully            | n/a   | Extended                            | n/a                     | n/a       | Y         | CT and MRI (T1                                                  | MRI at 3 months                                                                                       | (39) |

|             |      |                     |       |                       |   |   |   |                                      |    |      |
|-------------|------|---------------------|-------|-----------------------|---|---|---|--------------------------------------|----|------|
|             |      | endoscopic          |       | endonasal             |   |   |   | Weighted,<br>Gadolinium<br>Enhanced) |    |      |
| Zhang, 2018 | Both | Fully<br>endoscopic | Rigid | Extended<br>endonasal | N | N | Y | MRI, CT                              | CT | (40) |

B, Summary of information from the included studies

|  | Biopsy vs.<br>resection                                                                                                           | Combined<br>with open vs.<br>fully<br>endoscopic                                             | Rigid vs.<br>flexible<br>endoscope                          | Route and<br>technique                                                                                                                         | Fluorescence                           | Adjuvant<br>chemotherapy               | Adjuvant<br>radiotherapy                    | Preoperative<br>assessment                 | Post-operative assessment                   |  |
|--|-----------------------------------------------------------------------------------------------------------------------------------|----------------------------------------------------------------------------------------------|-------------------------------------------------------------|------------------------------------------------------------------------------------------------------------------------------------------------|----------------------------------------|----------------------------------------|---------------------------------------------|--------------------------------------------|---------------------------------------------|--|
|  | Of 34<br>studies<br>included,<br>the goal of<br>procedure<br>was:<br>23/34<br>Resection<br>(67.65%)<br><br>5/34 Both<br>Resection | 34/34 reported<br><br>26/34<br>(76.47%) Fully<br>Endoscopic<br><br>8/34 (23.53%)<br>Combined | 18/21<br>(85.71%)<br>Rigid<br><br>3/21 (14.29%)<br>Flexible | 32/34 reported<br>20/32<br>Transcranial<br><br>8/32 Extended<br>endonasal<br><br>3/32<br>Transorbital<br><br>1/32 transorbital<br>and extended | 7/15 Y<br>8/15 N<br><br>15/34 reported | 5/10 Y<br>5/10 N<br><br>10/34 reported | 11/ 13 Y<br>2/13 N<br><br>13/34<br>reported | 32/32 MRI<br>9/32 CT<br><br>32/34 reported | 26/27 MRI<br>11/34 CT<br><br>27/34 reported |  |

|  |                                                    |  |  |           |  |  |  |  |  |  |
|--|----------------------------------------------------|--|--|-----------|--|--|--|--|--|--|
|  | and Biopsy<br>(14.71%)                             |  |  | endonasal |  |  |  |  |  |  |
|  | 3/34 Biopsy<br>(8.82%)                             |  |  |           |  |  |  |  |  |  |
|  | 3/34 Biopsy<br>and ventri-<br>culostomy<br>(8.82%) |  |  |           |  |  |  |  |  |  |

<sup>a</sup>Reference citations refer to the reference list in the main manuscript.

Table SIII. Summary of outcomes of procedures.

| A, List of included studies and outcomes |                                                                |                     |                                                    |               |                          |                                                                                                                                                        |                      |
|------------------------------------------|----------------------------------------------------------------|---------------------|----------------------------------------------------|---------------|--------------------------|--------------------------------------------------------------------------------------------------------------------------------------------------------|----------------------|
| First author, year of publication        | Procedure success                                              | Duration of surgery | Adverse events                                     | Hospital stay | Follow-up                | Clinical outcomes                                                                                                                                      | (Refs.) <sup>a</sup> |
| Andreev, 2020                            | STR                                                            | n/a                 | n/a                                                | 14 days       | 14 days                  | Amaurosis of the right eye<br>Certain regression of psycho-emotional and amnesic disorders                                                             | (7)                  |
| Ansari, 2020                             | n/a                                                            | n/a                 | 1/17 multiorgan failure death<br>1/17 PE death     | n/a           | n/a                      | n/a                                                                                                                                                    | (8)                  |
| Barkhoudarian, 2017                      | 8/11 GTR<br>3/11 NTR                                           | n/a                 | None                                               | n/a           | n/a                      | 6/11 Improved symptoms                                                                                                                                 | (9)                  |
| Bettag, 2022                             | Endoscope visible fluorescence: 22/26<br>(21/22 true positive) | n/a                 | 2/26 wound infection<br>2/26 transient arm paresis | n/a           | 11.33±8.14 months (2-17) | Decrease<br><br>Mean preoperative KPS: 91.9% ± 9.8% a<br>Mean discharge KPS: 81.2% ± 23.4% (p = 0.006)<br><br>Mean overall survival: 11.04±8.65 months | (10)                 |

|                  |                                            |     |                                                                                           |     |                           |                                                                                                                                         |      |
|------------------|--------------------------------------------|-----|-------------------------------------------------------------------------------------------|-----|---------------------------|-----------------------------------------------------------------------------------------------------------------------------------------|------|
| Cathel, 2019     | Biopsy obtained                            | n/a | n/a                                                                                       | n/a | n/a                       | n/a                                                                                                                                     | (11) |
| Ceylan, 2009     | GTR                                        | n/a | n/a                                                                                       | n/a | 29 months                 | n/a                                                                                                                                     | (12) |
| Choo, 2018       | 2/2 GTR                                    | n/a | n/a                                                                                       | n/a | n/a                       | n/a                                                                                                                                     | (13) |
| Gazzeri, 2014    | n/a                                        | n/a | n/a                                                                                       | n/a | n/a                       | n/a                                                                                                                                     | (14) |
| Hanada, 2010     | Biopsy obtained and hydrocephalus resolved | n/a | None                                                                                      | n/a | 6 months                  | (2/2) Improved                                                                                                                          | (15) |
| Hong, 2016       | 1/2 GTR<br>1/2 NTR                         | n/a | n/a                                                                                       | n/a | n/a                       | n/a                                                                                                                                     | (16) |
| Hu, 2020         | STR                                        | n/a | None                                                                                      | n/a | 12 months                 | Improved symptoms<br>Signs and symptoms of diabetes insipidus (Polyuria, Hypernatremia, Low urine Specific Gravity) responding to DDAVP | (17) |
| Iacoangeli, 2012 | n/a                                        | n/a | n/a                                                                                       | n/a | n/a                       | Overall survival: 20 months                                                                                                             | (18) |
| Jeon, 2018       | GTR                                        | n/a | n/a                                                                                       | n/a | n/a                       | Improved                                                                                                                                | (19) |
| Jiminez, 2017    | n/a                                        | n/a | n/a                                                                                       | n/a | n/a                       | n/a                                                                                                                                     | (20) |
| Kassam, 2009     | 4/12 GTR<br>4/12 NTR<br>4/12 STR           | n/a | 1/12 brain abscess + pulmonary embolism<br>1/12 re-cannulation (missed tumour first time) | n/a | Median 5 months<br>(2-24) | n/a                                                                                                                                     | (21) |

|                  |                                            |                     |               |     |          |                                                                                                              |      |
|------------------|--------------------------------------------|---------------------|---------------|-----|----------|--------------------------------------------------------------------------------------------------------------|------|
|                  |                                            |                     |               |     |          |                                                                                                              |      |
| Kruljac, 2010    | STR                                        | n/a                 | n/a           | n/a | n/a      | n/a                                                                                                          | (22) |
| Kutlay, 2016     | 2/2 GTR                                    | n/a                 | n/a           | n/a | n/a      | n/a                                                                                                          | (23) |
| Kutlay, 2021     | 6/7 GTR<br>1/7 NTR                         | 124.43 min (85-160) | None          | n/a | 3 months | n/a                                                                                                          | (24) |
| Kutlay, 2021     | 6/7 GTR<br>1/7 NTR                         | 119.29 min (83-160) | None          | n/a | 3 months | n/a                                                                                                          | (25) |
| Ma, 2018         | 7/11 GTR<br>2/11 NTR<br>2/11 STR           | n/a                 | 1/11 CSF leak | n/a | n/a      | 11/11 Median overall survival 12.9 months<br><br>11/11 Improved                                              | (26) |
| Maeshima, 2022   | STR                                        | n/a                 | n/a           | n/a | 4 months | Aphasia & Rt Hemiplegia not improved<br><br>Condition gradually deteriorated and died 4 months postoperative | (27) |
| McLaughlin, 2012 | 2/2 GTR                                    | n/a                 | n/a           | n/a | n/a      | n/a                                                                                                          | (28) |
| Mitsumasa, 2020  | Biopsy obtained                            | n/a                 | n/a           | n/a | n/a      | n/a                                                                                                          | (29) |
| Nemoto, 2013     | Biopsy obtained and hydrocephalus resolved | n/a                 | n/a           | n/a | 3 months | Gradual improvement of the hydrocephalus, the patient was able to communicate and walk with assistance       | (30) |
| Newman, 2019     | 2/2 GTR                                    | n/a                 | None          | n/a | 3 months | n/a                                                                                                          | (31) |

|                  |                                    |     |                                                             |     |                  |                                                                                       |      |
|------------------|------------------------------------|-----|-------------------------------------------------------------|-----|------------------|---------------------------------------------------------------------------------------|------|
| Plaha, 2014      | 11/12 GTR<br>1/12 STR              | n/a | 1/12 wound infection                                        | n/a | n/a              | n/a                                                                                   | (32) |
| Serra, 2020      | n/a                                | n/a | n/a                                                         | n/a | 3 months         | n/a                                                                                   | (33) |
| Shirane, 2001    | 2/2 GTR                            | n/a | n/a                                                         | n/a | n/a              | (2/2) Improved - excellent postoperative outcomes                                     | (34) |
| Souweidane, 2000 | n/a                                | n/a | n/a                                                         | n/a | n/a              | n/a                                                                                   | (35) |
| Stamates, 2018   | STR                                | n/a | n/a                                                         | n/a | 12 months        | Improved - Alive and Well at 12 months                                                | (36) |
| Villanueva, 2015 | 1/2 GTR<br>1/2 NTR                 | n/a | 1/2 Proximal optic radiation infarct                        | n/a | (1/2) 30 months  | (1/2) improved                                                                        | (37) |
| Zacharia, 2015   | 4/10 GTR<br>6/10 STR<br>2/2 Biopsy | n/a | 7/12 intraoperative CSF leak<br><br>3/12 panhypopituitarism | n/a | 14 months (1-55) | Median overall survival: 16 months<br><br>Median progression free survival: 18 months | (38) |
| Zagzoog, 2017    | STR                                | n/a | None                                                        | n/a | 3 months         | Minimal movement of the right eye outwards, diplopia improved marginally              | (39) |
| Zhang, 2018      | Biopsy (1/1)<br>STR (1/1)          | n/a | 1/1 bleed requiring 400 ml transfusion                      | n/a | 4 months         | Small improvement in symptoms                                                         | (40) |

B, Summary of outcomes

|  | Procedure success                                                                                                                                                                                                                                                                                               | Duration of surgery                                                            | Adverse events                                                                                                                                                                                                                                                                                                                                                                                                                                                                                                                                                                             | Hospital stay                                   | Follow-up                                                                                                 | Clinical outcomes                                                                                                                                                                                                                                                                                                                                                                                         |
|--|-----------------------------------------------------------------------------------------------------------------------------------------------------------------------------------------------------------------------------------------------------------------------------------------------------------------|--------------------------------------------------------------------------------|--------------------------------------------------------------------------------------------------------------------------------------------------------------------------------------------------------------------------------------------------------------------------------------------------------------------------------------------------------------------------------------------------------------------------------------------------------------------------------------------------------------------------------------------------------------------------------------------|-------------------------------------------------|-----------------------------------------------------------------------------------------------------------|-----------------------------------------------------------------------------------------------------------------------------------------------------------------------------------------------------------------------------------------------------------------------------------------------------------------------------------------------------------------------------------------------------------|
|  | <p>Of studies reporting resection as goal:</p> <p>23/28 report GTR/NTR/STR</p> <p>60/93 GTR (64.51%)<br/>13/93 NTR (13.98%)<br/>20/93 STR (21.50%)</p> <p>Of studies reporting biopsy as goal:</p> <p>6/6 report success of biopsy</p> <p>7/7 Biopsy Obtained (100%)</p> <p>6/34 report no outcome measures</p> | <p>Only reported in 2 studies by same group:</p> <p>121.86 mins (83 - 160)</p> | <p>In studies where complications are reported, across 124 patients, adverse events reported include:</p> <p><b>Intraoperative Complications:</b></p> <p>7 Intraoperative CSF leaks<br/>1 intraoperative hemorrhage requiring 400mL transfusion</p> <p><b>Post-operative Complications:</b></p> <p>3 wound infections<br/>3 panhypopituitarism<br/>2 Transient arm paresis<br/>1 Postoperative CSF leak<br/>1 brain abscess + pulmonary embolism<br/>1 re-cannulation (missed tumour first time)<br/>1 Proximal optic radiation infarct<br/>1 multiorgan failure, death<br/>1 PE death</p> | <p>Only reported in 1 study:</p> <p>14 days</p> | <p>Wide range depending on study criteria and case outcomes after surgery:</p> <p>14 days - 55 months</p> | <p>Symptoms</p> <p>11 studies report symptomatic improvement<br/>2 report no improvement/decline</p> <p>28/34 (82.35%) of patients were reported to have at least some level of symptomatic improvement.</p> <p>Average of overall survival reported in 4 studies (50 patients) is 14.99 months. When weighted by the number of patients in each study, the average overall survival is 12.82 months.</p> |

<sup>a</sup>Reference citations refer to the reference list in the main manuscript. GTR, gross total resection; NTR, near total resection; STR, subtotal resection.
